# Supplementary material for: PARP-1, EpCAM, and FRα as potential targets for intraoperative detection and delineation of endometriosis: a quantitative tissue expression analysis
Source: Springer Nature journal article supplement (doi:10.1186/s12958-024-01264-0), 2024-07-31
Supplement: MOESM4 [file 12958_2024_1264_MOESM4_ESM.pdf]

Proliferative endometrium

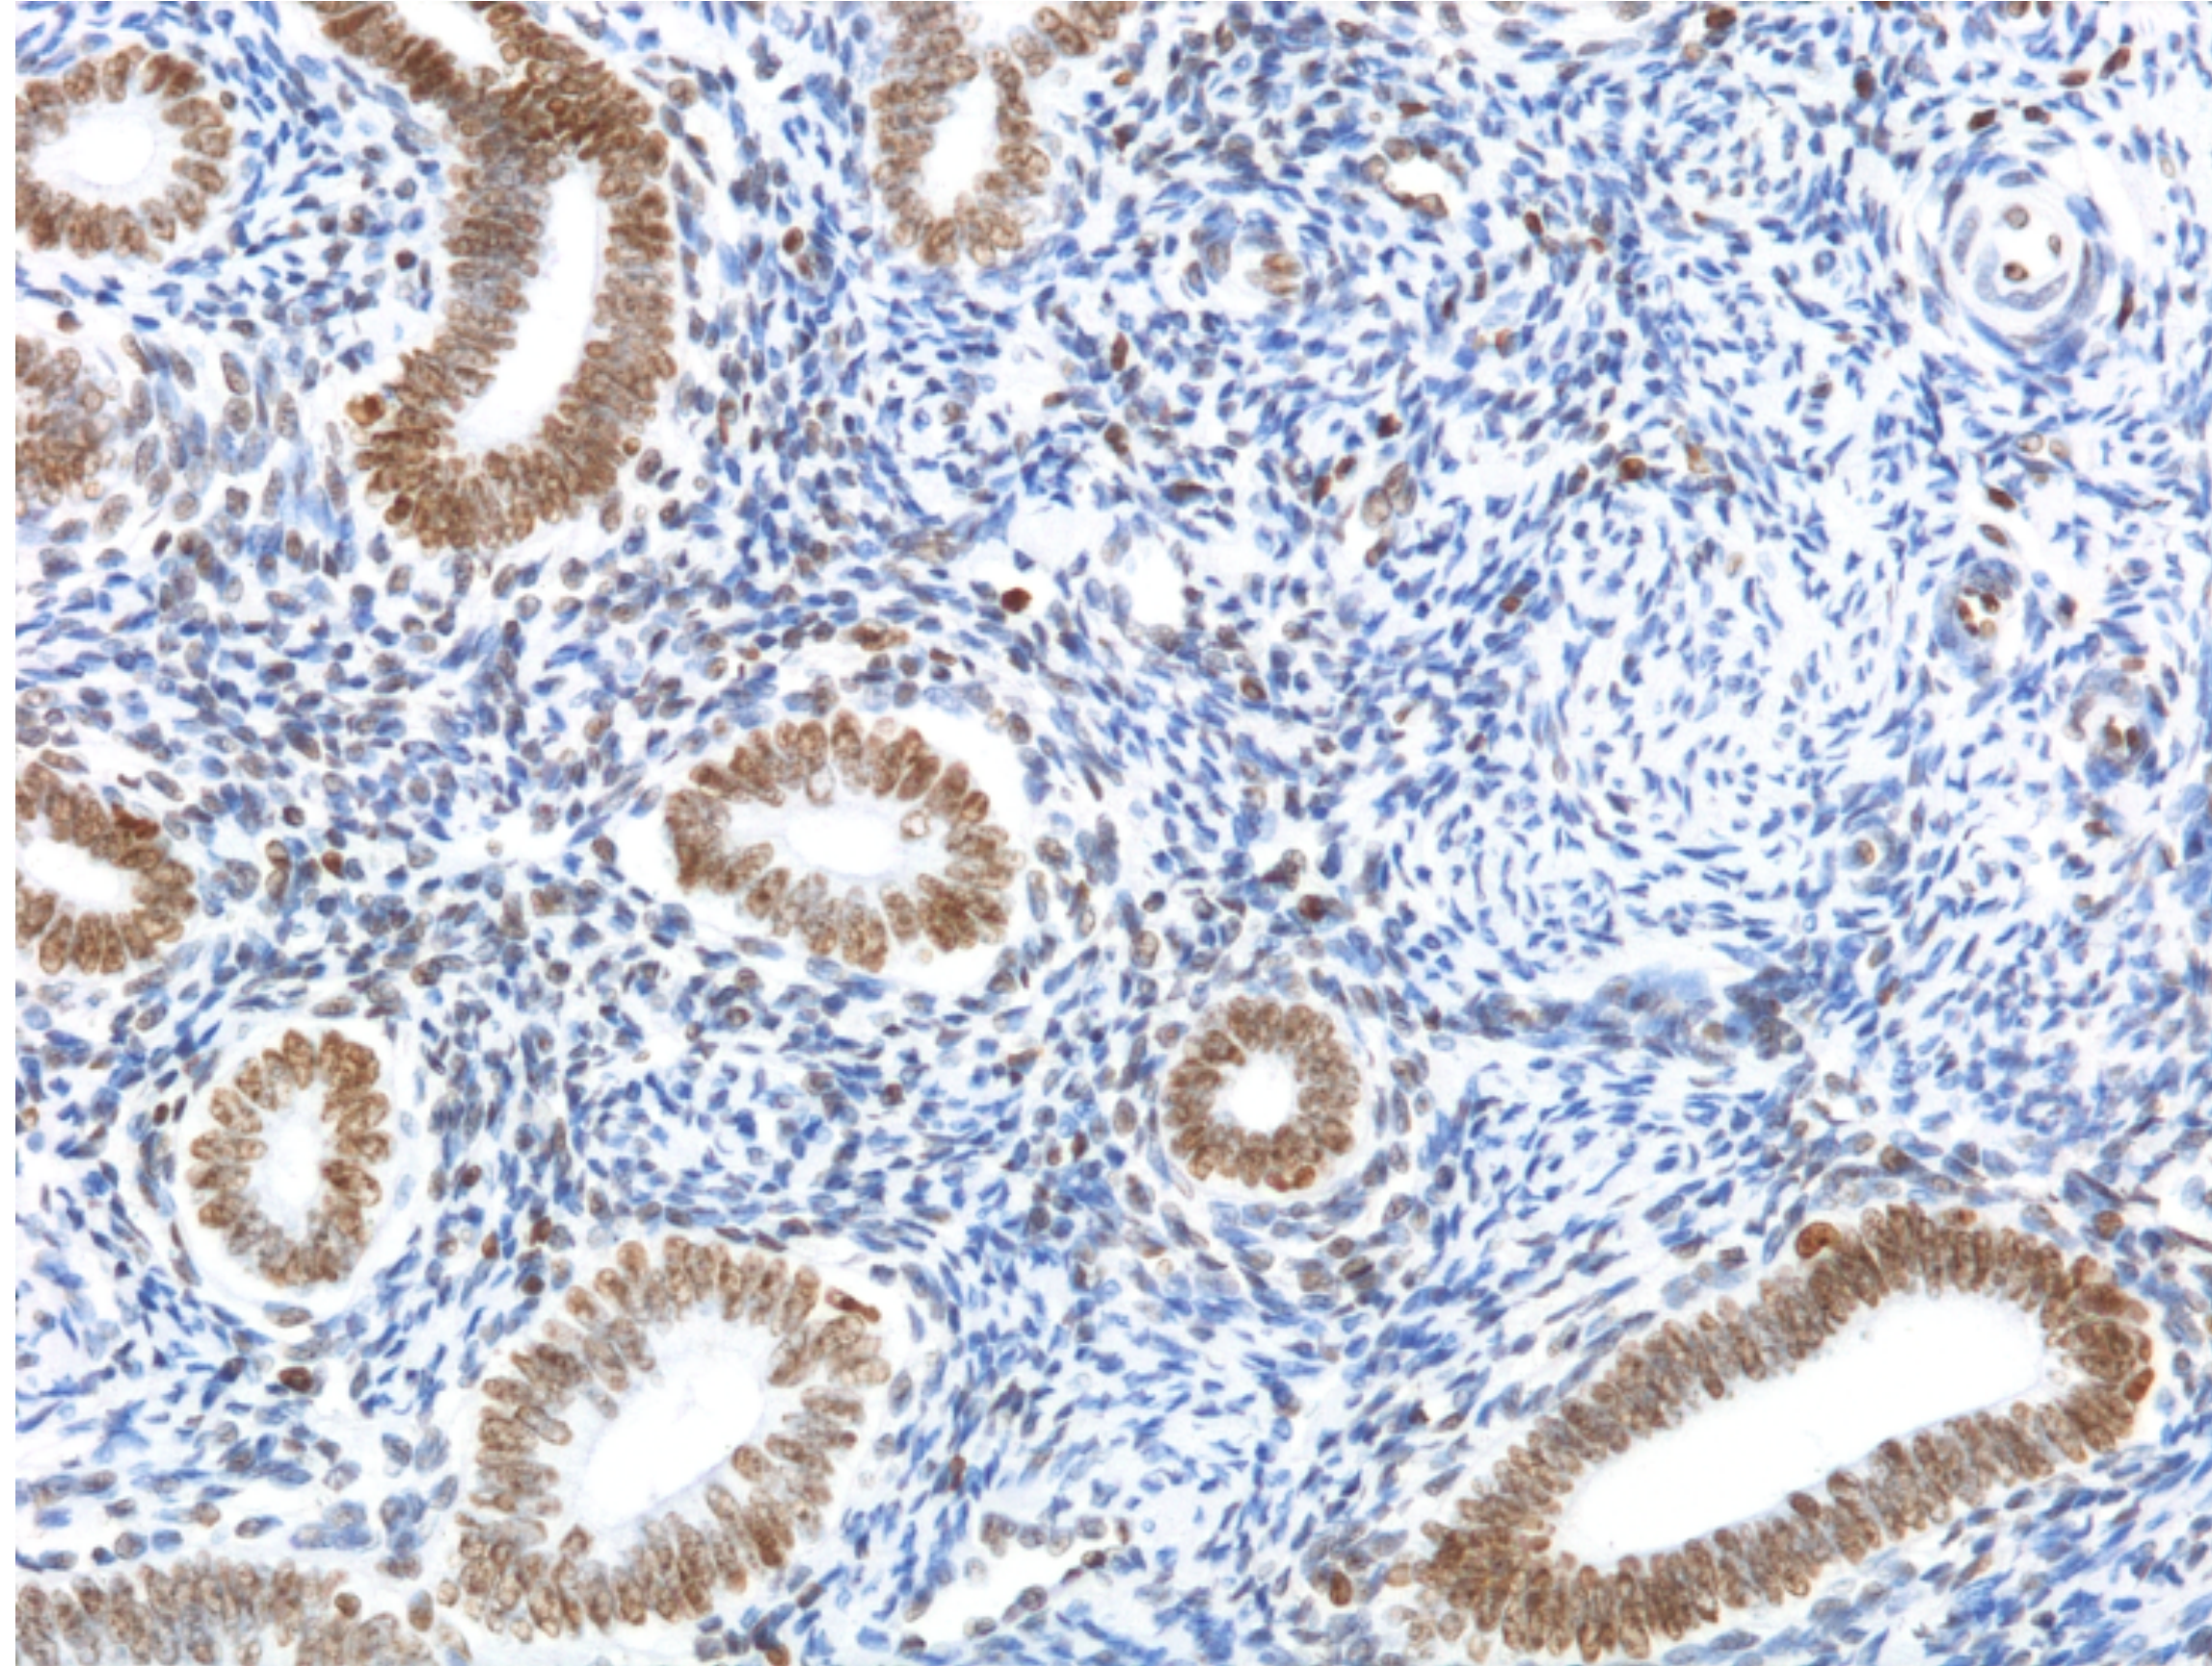

Secretory endometrium

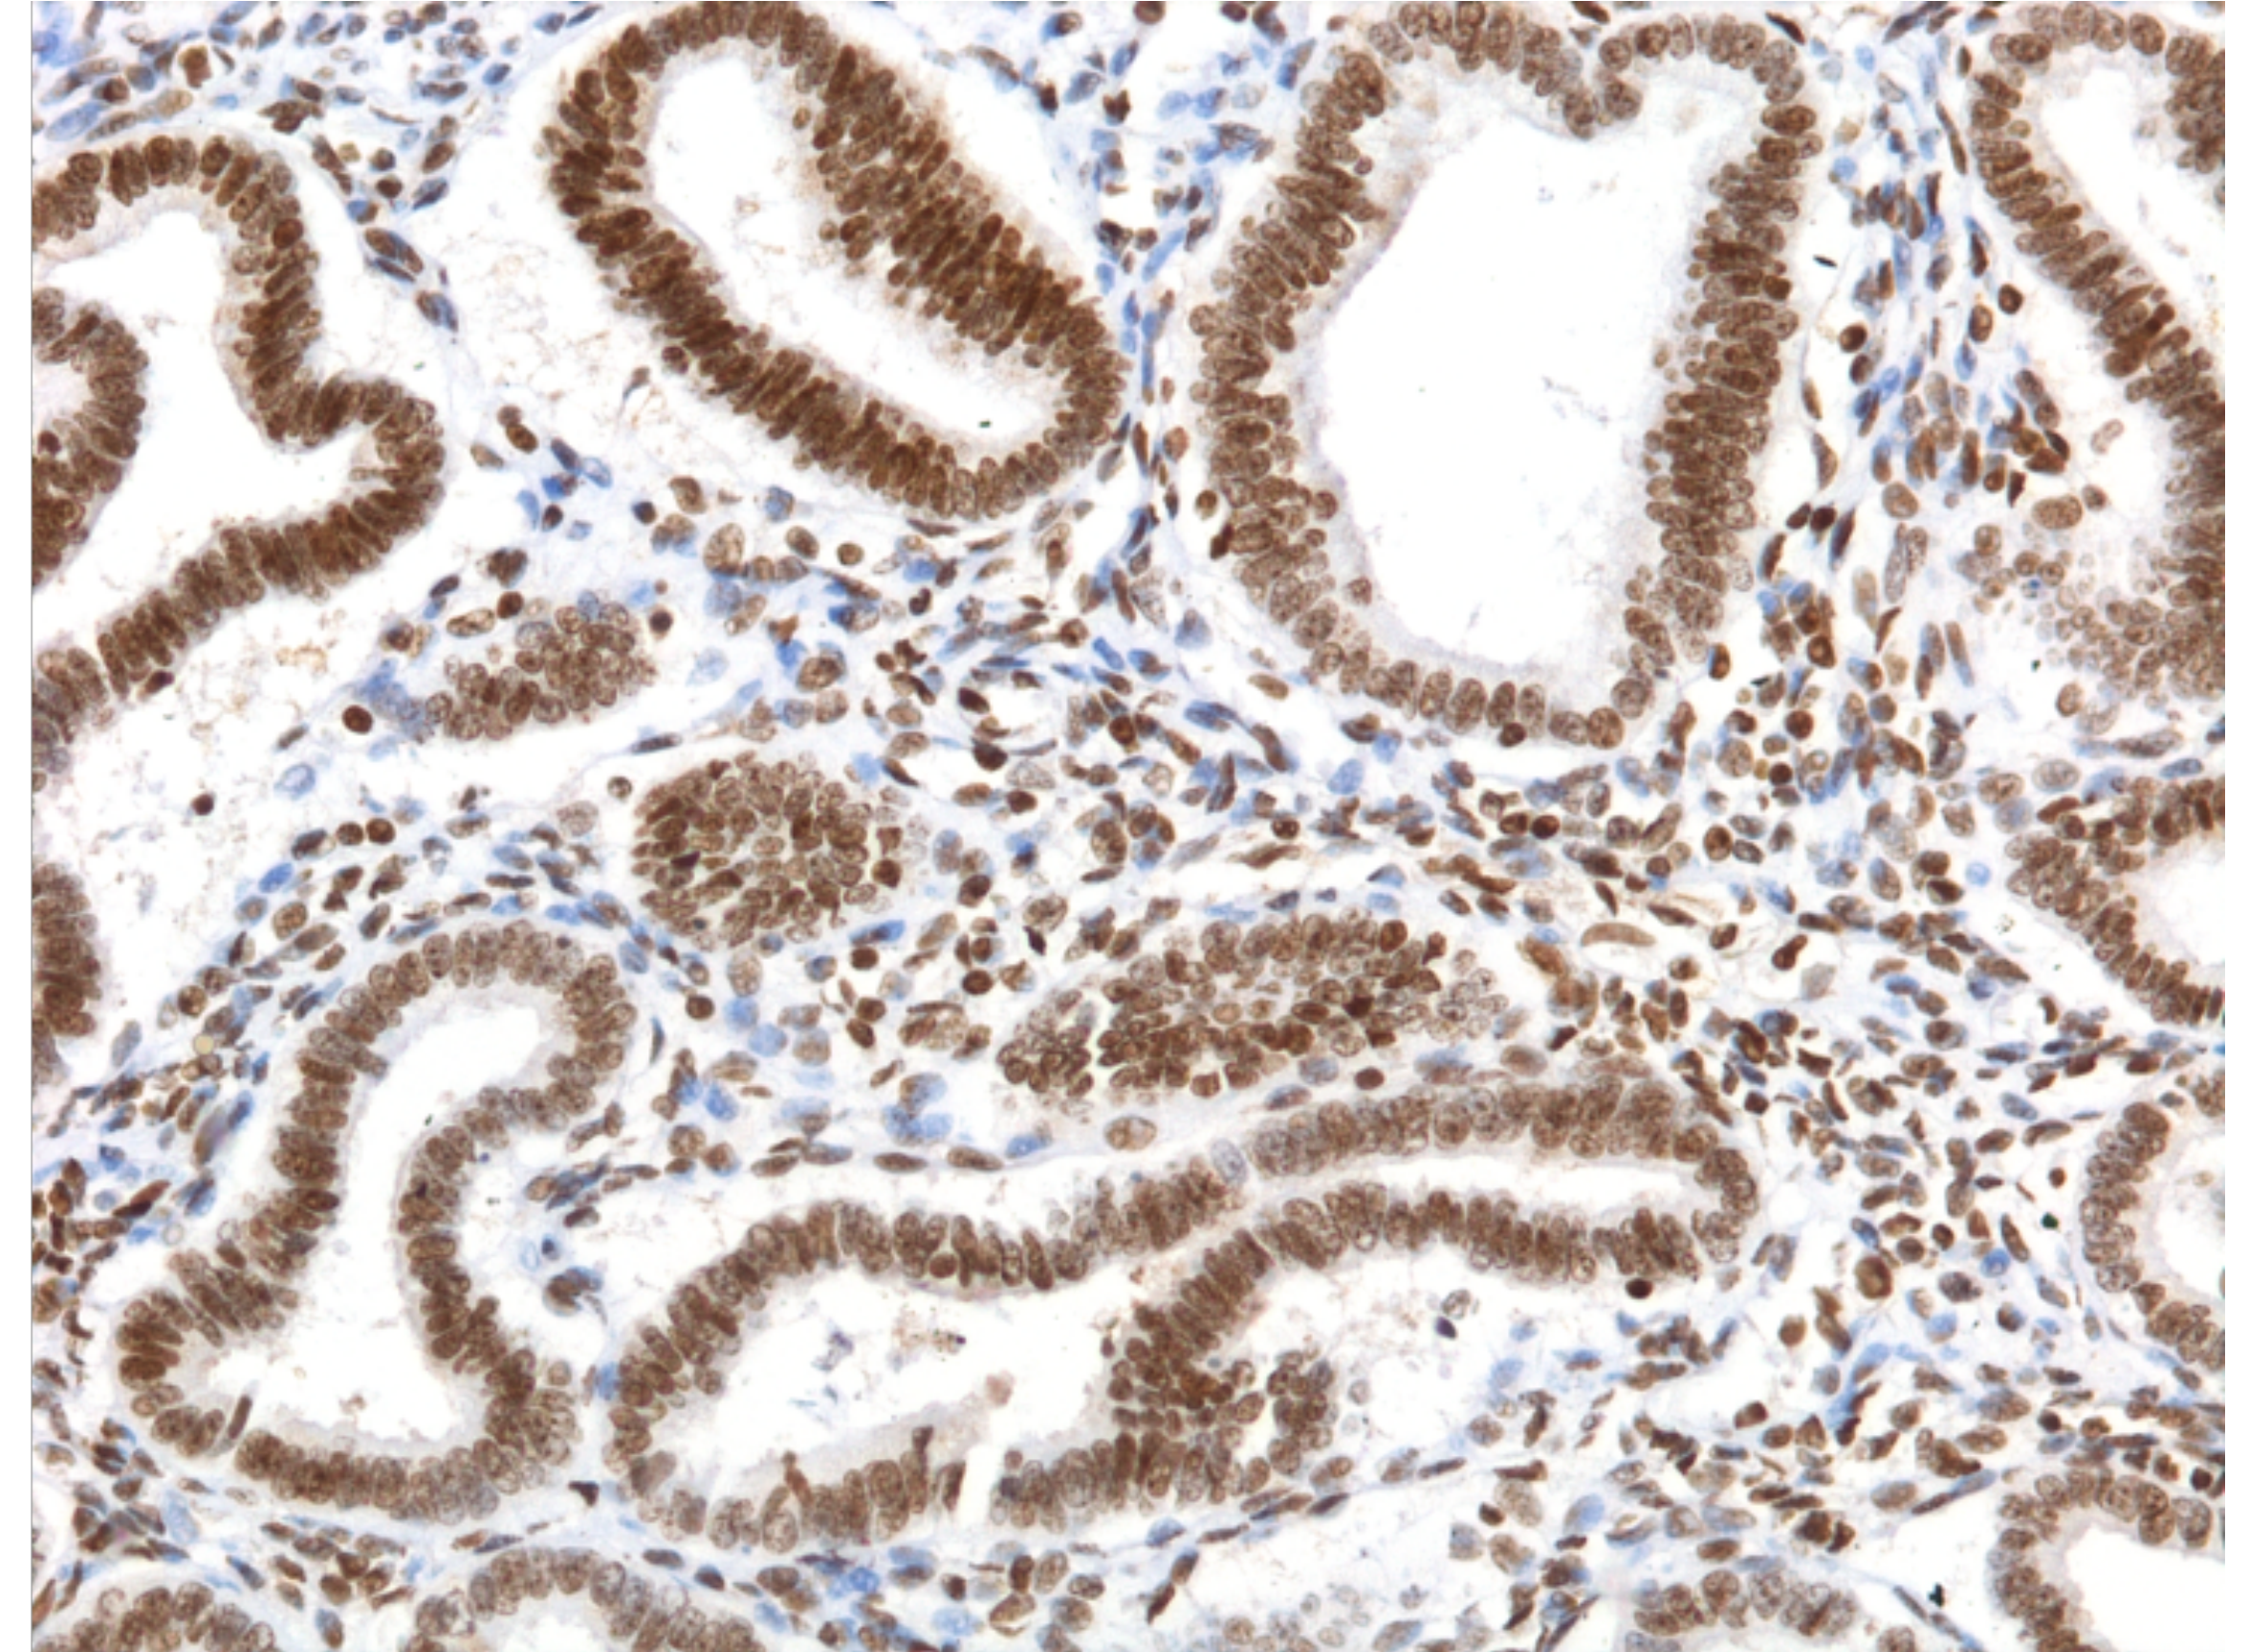

PARP-1 is expressed in various components, including endometrial glandular elements, cytotogenic stromal elements, and uncommon immune elements. Interestingly, the secretory phase exhibits a more prominent expression profile, particularly in the stromal layer.
